# Supplementary material
Source: PubMed Central journal article supplement (PMC4838033)
Supplement: NIHMS777322-supplement-Supplement.pdf [file NIHMS777322-supplement-Supplement.pdf]

## Supplementary Online Content

Ariño H, Höftberger R, Gresa-Arribas N, et al. Paraneoplastic neurological syndromes and glutamic acid decarboxylase antibodies. *JAMA Neurol*. Published online June 22, 2015. doi:10.1001/jamaneurol.2015.0749.

**eFigure.** Flowchart of Patients

**eTable 1.** Patients of Our Series With Paraneoplastic Neurological Syndromes and GAD Antibodies

**eTable 2.** Literature Survey of Patients With Paraneoplastic Neurological Syndromes and GAD Antibodies

**eReferences**

This supplementary material has been provided by the authors to give readers additional information about their work.

**eFigure. Flowchart of Patients**

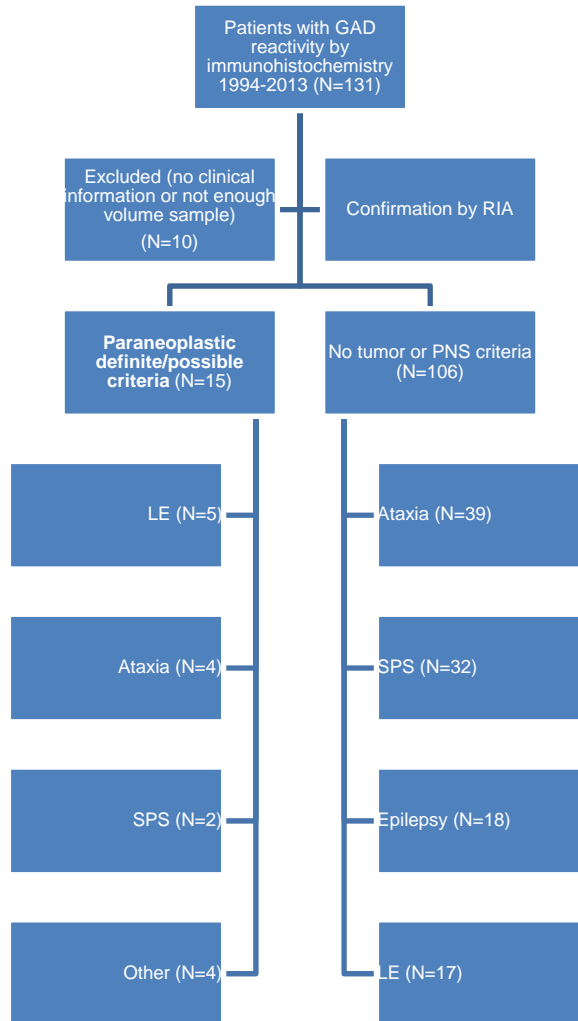

RIA: radioimmunoassay; PNS: paraneoplastic syndrome; LE: limbic encephalitis; SPS: stiff-person syndrome.

**eTable 1.** Patients of Our Series With Paraneoplastic Neurological Syndromes and GAD Antibodies

| Patient | Age/Sex | Syndrome               | PNS level | First diagnosis<br>(delay in months) | Tumor                                            | Treatment                                               | Outcome<br>(follow-up in months)                              | Comments                                |
|---------|---------|------------------------|-----------|--------------------------------------|--------------------------------------------------|---------------------------------------------------------|---------------------------------------------------------------|-----------------------------------------|
| 1       | 80/M    | LE                     | Definite  | PNS (3)                              | SCLC (relapse)                                   | Steroids, chemotherapy                                  | Worse (6)                                                     | Thyroiditis                             |
| 2       | 79/M    | CA                     | Possible  | PNS (2)                              | NSCLC                                            | IVIg, steroids                                          | Worse (7)                                                     |                                         |
| 3       | 54/M    | CA                     | Possible  | PNS (6)                              | Thymic neuroendocrine carcinoma <sup>a</sup>     | Surgery, chemotherapy, RT, IVIg, steroids, rituximab    | Improved (91)                                                 | Hypothyroidism and diabetes years later |
| 4       | 57/F    | PCD                    | Definite  | PNS (1)                              | Thymic neuroendocrine carcinoma                  | Steroids, IFN alpha-2b                                  | Improved (4)                                                  | Hypothyroidism                          |
| 5       | 67/M    | PEM                    | Definite  | PNS (3)                              | Pancreatic neuroendocrine carcinoma <sup>a</sup> | Surgery, IVIg, diazepam, baclofen, gabapentine          | Death (12)                                                    |                                         |
| 6       | 61/F    | CA                     | Possible  | Tumor (15)                           | Breast                                           | Surgery, chemotherapy, RT, IVIg, PLEX, cyclophosphamide | Stable (91), relapse 3 years later, response to immunotherapy | Myasthenia                              |
| 7       | 73/F    | LE                     | Definite  | PNS (2)                              | NHL (Burkitt)                                    | Steroids, IVIg                                          | Death (3)                                                     | Dysautonomia                            |
| 8       | 70/M    | LE                     | Definite  | PNS (1)                              | SCLC                                             | Steroids, IVIg,                                         | Death (2)                                                     |                                         |
| 9       | 78/F    | Brainstem <sup>b</sup> | Possible  | PNS (5)                              | Pancreatic neuroendocrine carcinoma <sup>a</sup> | Surgery, chemotherapy, IVIg                             | Stable (27)                                                   |                                         |
| 10      | 66/M    | LE                     | Definite  | PNS (1)                              | SCLC                                             | Steroids, IVIg                                          | Death (13)                                                    |                                         |
| 11      | 37/M    | LE                     | Definite  | PNS (3)                              | Thymoma                                          | Surgery, steroids                                       | Improved (4)                                                  | Later developed                         |

© 2015 American Medical Association. All rights reserved.

|    |      |                           |          |                         |         |                                                 |              |                               |
|----|------|---------------------------|----------|-------------------------|---------|-------------------------------------------------|--------------|-------------------------------|
|    |      |                           |          |                         |         |                                                 |              | SPS                           |
| 12 | 72/M | OMS                       | Definite | Tumor (1)               | NSCLC   | Surgery, chemotherapy, IVIg, steroids           | Death (1)    |                               |
| 13 | 47/M | SPS                       | Possible | Tumor (27) <sup>c</sup> | SCLC    | Chemotherapy, steroids                          | Stable (9)   | Diabetes                      |
| 14 | 40/F | SPS                       | Possible | PNS (24)                | Breast  | Surgery, chemotherapy, IVIg, steroids, diazepam | Worse (84)   | Thyroiditis, CA 5 years later |
| 15 | 29/F | Encephalitis <sup>d</sup> | Possible | Tumor (19)              | Thymoma | Surgery, steroids, PLEX                         | Improved (2) | Myasthenia                    |

PNS: paraneoplastic neurological syndrome; LE: limbic encephalitis; PCD: paraneoplastic cerebellar degeneration; PEM: paraneoplastic encephalomyelitis; SCLC: small-cell lung cancer; NSCLC: non-small cell lung cancer; HNL: non-Hodgkin lymphoma; SPS: stiff-person syndrome; RT: radiotherapy; PLEX: plasma exchange; IVIg: intravenous immunoglobulins; OMS: opsoclonus-myoclonus syndrome

<sup>a</sup> Tumor cells expressed GAD65; <sup>b</sup> Vertigo, ataxia, axial rigidity, and dysautonomia; <sup>c</sup> Tumor active at the time of PNS diagnosis; <sup>d</sup> Sleepiness, aphasia, left faciobrachial paresis and dystonic movements in both legs with a MRI showing multifocal cortico-subcortical hyperintensities in FLAIR sequences that improved in a second MRI.

**eTable 2.** Literature Survey of Patients With Paraneoplastic Neurological Syndromes and GAD Antibodies<sup>1-19</sup>

| Author (year)    | Age/sex | Syndrome  | PNS level             | First diagnosis (delay in months) | Tumor             | Treatment                              | Outcome (follow-up in months) | Comments                                  |
|------------------|---------|-----------|-----------------------|-----------------------------------|-------------------|----------------------------------------|-------------------------------|-------------------------------------------|
| Ferrari (1990)   | 31/M    | SPS       | Possible <sup>a</sup> | PNS (1)                           | Hodgkin (relapse) | Chemotherapy, diazepam, baclofen       | Improved (12)                 |                                           |
| Silverman (1999) | 68/F    | SPS (SLS) | Possible              | PNS (1)                           | Breast            | Steroids, clonazepam                   | Death (18)                    | Grave's disease. Autopsy: no inflammation |
| Hagiwara (2001)  | 40/F    | SPS       | Possible              | PNS (1)                           | Thymoma           | Surgery, RT steroids, immunoadsorption | Improved (?)                  |                                           |
| Sinnreich (2001) | 85/F    | SPS       | Possible              | PNS (6)                           | Breast            | Surgery, PLEX, IVIg, steroids          | Improved (7)                  | Hashimoto; uveitis                        |
| Schiff (2003)    | 47/F    | SPS (SLS) | Possible              | Tumor relapse (9)                 | Multiple myeloma  | Diazepam                               | Improved (24)                 | Hypothyroidism, epilepsy                  |
| Thomas (2005)    | 45/M    | SPS       | Possible <sup>a</sup> | PNS (11)                          | Thymoma           | Surgery, baclofen, IVIg, clonazepam    | Improved (18)                 |                                           |
| Tanaka H (2005)  | 57/F    | SPS       | Possible <sup>a</sup> | PNS (4)                           | Thymoma           | Diazepam, surgery baclofen             | Improved (24)                 | SPS relapse, responded to IVIg            |
| Iwata T (2006)   | 79/F    | SPS (SLS) | Possible <sup>a</sup> | PNS (3)                           | Thymoma           | Surgery, IVIg                          | Improved (12)                 | A relapse treated with PE                 |
| McHugh (2007)    | 53/M    | SPS (SLS) | Possible              | PNS (11)                          | Kindy             | IVIg, baclofen, diazepam               | Improved (48)                 | Hypothyroidism and diabetes               |
| Agarwal (2010)   | 55/F    | SPS (SLS) | Possible <sup>a</sup> | PNS (2)                           | Breast            | Chemotherapy, steroids, baclofen,      | Improved (12)                 |                                           |

|                       |      |                 |                       |                         |                           |                                                                   |                |                                                        |
|-----------------------|------|-----------------|-----------------------|-------------------------|---------------------------|-------------------------------------------------------------------|----------------|--------------------------------------------------------|
|                       |      |                 |                       |                         |                           | diazepam                                                          |                |                                                        |
| Rakocevic (2012)      | 44/F | SPS             | Possible <sup>c</sup> | Tumor (48) <sup>b</sup> | Cutaneous T cell lymphoma | Baclofen, IVIg, diazepam, steroids, cyclophosphamide, tacrolimus, | Improved (156) | rituximab and alemtuzumab for relapses                 |
| Aghajanzadeh (2013)   | 32/M | SPS             | Definite <sup>a</sup> | PNS (5)                 | Thymic carcinoma          | Surgery                                                           | Improved (11)  | Baclofen and diazepam not effective                    |
| Koca (2014)           | 58/F | SPS             | Possible <sup>a</sup> | Tumor (?) <sup>d</sup>  | Mesothelioma              | Diazepam, baclofen, steroids                                      | Death (3)      | SPS did not improve                                    |
| Kobayashi (2014)      | 68/M | SPS             | Possible <sup>a</sup> | PNS (1)                 | Thymoma                   | Surgery, steroids                                                 | Improved (156) | Relapse 13 years later at the time of tumor recurrence |
| Spitz (2004)          | 73/M | PERM            | Possible <sup>a</sup> | PNS (0.5)               | SCLC                      | Chemotherapy, IVIg, diazepam                                      | Death (1)      |                                                        |
| Venker (2011)         | 52/M | CA and dystonia | Possible <sup>a</sup> | PNS (11)                | Breast (relapse)          | Chemotherapy, immunosorption                                      | Improved (13)  |                                                        |
| Carra-Dalliere (2012) | 59/M | PEM             | Definite              | PNS (1)                 | SCLC                      | Chemotherapy, RT, IVIg                                            | Improved (12)  |                                                        |
| Laroumagne (2014)     | 65/M | OMS             | Definite              | PNS (0.5)               | SCLC                      | Chemotherapy, steroids                                            | Death (1)      |                                                        |
| Lamotte (2014)        | 61/M | OMS             | Definite              | PNS (0.5)               | Pyiform sinus             | Chemotherapy, RT, IVIg                                            | Improved (6)   |                                                        |

PNS: paraneoplastic neurological syndrome; SLS, stiff-limb syndrome; SPS: Stiff-person syndrome; RT: radiotherapy; PLEX: plasma exchange; IVIg: intravenous immunoglobulins; PERM: progressive encephalomyelitis with rigidity and myoclonus; PEM: paraneoplastic encephalomyelitis; SCLC: small-cell lung cancer; OMS: opsoclonus-myoclonus syndrome

<sup>a</sup> Amphiphysin antibodies not tested; <sup>b</sup> tumor active at the onset of the PNS; <sup>c</sup> PNS improved each time tumor was put into remission; <sup>d</sup> tumor active at the time of SPS diagnosis.

## eReferences (eFigure, eTable2)

1. Agarwal PA, Ichaporia NR. Glutamic acid decarboxylase antibody-positive paraneoplastic stiff limb syndrome associated with carcinoma of the breast. *Neurology India*. 2010;58(3):449-451.
2. Aghajanzadeh M, Alavi A, Aghajanzadeh G, Massahania S. Stiff man syndrome with invasive thymic carcinoma. *Archives of Iranian medicine*. 2013;16(3):195-196.
3. Carra-Dalliere C, Thouvenot E, Bonafé A, Ducray F, Touchon J, Charif M. [Anti-GAD antibodies in paraneoplastic cerebellar ataxia associated with limbic encephalitis and autonomic dysfunction]. *Revue neurologique*. 2012;168(4):363-366.
4. Ferrari P, Federico M, Grimaldi LM, Silingardi V. Stiff-man syndrome in a patient with Hodgkin's disease. An unusual paraneoplastic syndrome. *Haematologica*. 1990;75(6):570-572.
5. Hagiwara H, Enomoto-Nakatani S, Sakai K, Ugawa Y, Kusunoki S, Kanazawa I. Stiff-person syndrome associated with invasive thymoma: a case report. *Journal of the neurological sciences*. 2001;193(1):59-62.
6. Iwata T, Inoue K, Mizuguchi S, Morita R, Tsukioka T, Suehiro S. Thymectomy for paraneoplastic stiff-person syndrome associated with invasive thymoma. *The Journal of thoracic and cardiovascular surgery*. 2006;132(1):196-197.
7. Kobayashi R, Kaji M, Horiuchi S, Miyahara N, Hino Y, Suemasu K. Recurrent thymoma with stiff-person syndrome and pure red blood cell aplasia. *The Annals of thoracic surgery*. 2014;97(5):1802-1804.
8. Koca I, Ucar M, Kalender ME, Alkan S. The horses are the first thought but one must not forget the zebras even if they are rare: Stiff person syndrome associated with malignant mesothelioma. *BMJ case reports*. 2014;2014.
9. Lamotte G, Danaila TC, Jaillon-Rivière V, Hitier M, Defer GL. Paraneoplastic opsoclonus myoclonus with autoantibodies to glutamic acid decarboxylase. *Revue neurologique*. 2014;170(1):50-51.
10. Laroumagne S, Elharrar X, Coiffard B, et al. "Dancing eye syndrome" secondary to opsoclonus-myoclonus syndrome in small-cell lung cancer. *Case reports in medicine*. 2014;2014:545490.
11. McHugh JC, Murray B, Renganathan R, Connolly S, Lynch T. GAD antibody positive paraneoplastic stiff person syndrome in a patient with renal cell carcinoma. *Movement disorders : official journal of the Movement Disorder Society*. 2007;22(9):1343-1346.
12. Rakocevic G, Hussain A. Stiff person syndrome improvement with chemotherapy in a patient with cutaneous T cell lymphoma. *Muscle & nerve*. 2013;47(6):938-939.
13. Schiff D, Dalmau J, Myers DJ. Anti-GAD antibody positive stiff-limb syndrome in multiple myeloma. *Journal of neuro-oncology*. 2003;65(2):173-175.
14. Silverman IE. Paraneoplastic stiff limb syndrome. *Journal of neurology, neurosurgery, and psychiatry*. 1999;67(1):126-127.

15. Sinnreich M, Assal F, Hefft S, et al. Anti-GAD antibodies and breast cancer in a patient with stiff-person syndrome: a puzzling association. *European neurology*. 2001;46(1):51-52.
16. Spitz M, Ferraz HB, Barsottini OGP, Gabbai AA. Progressive encephalomyelitis with rigidity: a paraneoplastic presentation of oat cell carcinoma of the lung. Case report. *Arquivos de neuro-psiquiatria*. 2004;62(2B):547-549.
17. Tanaka H, Matsumura A, Okumura M, Kitaguchi M, Yamamoto S, Iuchi K. Stiff man syndrome with thymoma. *The Annals of thoracic surgery*. 2005;80(2):739-741.
18. Thomas S, Critchley P, Lawden M, et al. Stiff person syndrome with eye movement abnormality, myasthenia gravis, and thymoma. *Journal of neurology, neurosurgery, and psychiatry*. 2005;76(1):141-142.
19. Venker C, Krämer M, Berlit P. GAD-ab-associated movement disorder in a male patient with breast cancer. *Journal of neurology*. 2011;258(7):1356-1357.
20. Graus F, Delattre JY, Antoine JC, et al. Recommended diagnostic criteria for paraneoplastic neurological syndromes. *Journal of neurology, neurosurgery, and psychiatry*. 2004;75(8):1135-1140.
